# Supplementary material for: One-step liquid molding based modular microfluidic circuits
Source: Royal Society of Chemistry journal article supplement (doi:10.1039/d0an01134g), 2020-01-01
Supplement: d0an01134g2.pdf [file d0an01134g2.pdf]

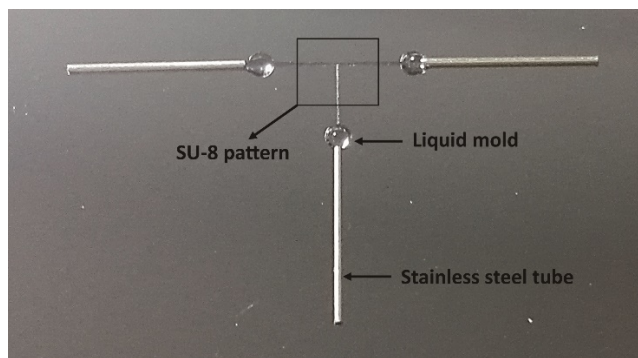

Figure S1 Photograph of the fabricated molds on the silicon substrate.

Table S1 Parameters of functional components

| Design parameters                                                                                                                                                                                                                                                                                                                                                                                                                                                                              |
|------------------------------------------------------------------------------------------------------------------------------------------------------------------------------------------------------------------------------------------------------------------------------------------------------------------------------------------------------------------------------------------------------------------------------------------------------------------------------------------------|
| <p data-bbox="724 443 868 465">Straight channel</p> 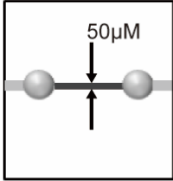 <p data-bbox="794 488 861 515">50µM</p> <p>The diagram shows a horizontal channel with two grey spheres at its ends. A vertical double-headed arrow in the center indicates a width of 50µm.</p>                                                                                                                                                         |
| <p data-bbox="724 685 868 707">T-shaped junction</p>  <p data-bbox="772 752 839 779">100µM</p> <p data-bbox="820 824 887 851">100µM</p> <p>The diagram shows a horizontal channel with two grey spheres at its ends. A vertical channel of 100µm width intersects it from the bottom. The width of the horizontal channel is also 100µm.</p>                                                                  |
| <p data-bbox="724 931 868 954">Serpentine channel</p>  <p data-bbox="724 999 791 1025">100µM</p> <p>The diagram shows a horizontal channel with two grey spheres at its ends. The channel has a wavy, serpentine path. A vertical double-headed arrow on the left indicates a width of 100µm.</p>                                                                                                            |
| <p data-bbox="724 1178 868 1200">Incubation chamber</p>  <p data-bbox="663 1245 730 1272">300µM</p> <p data-bbox="852 1245 919 1272">2.3mm</p> <p data-bbox="756 1335 823 1361">19mm</p> <p>The diagram shows a horizontal channel with two grey spheres at its ends. A central chamber contains a porous medium. The chamber's width is 300µm, its length is 19mm, and its height is 2.3mm.</p>            |
| <p data-bbox="724 1424 868 1447">Y-shaped junction</p>  <p data-bbox="804 1491 871 1518">200µM</p> <p>The diagram shows a Y-shaped junction with three grey spheres at its ends. The width of the horizontal stem is 200µm.</p>                                                                                                                                                                             |
| <p data-bbox="724 1671 868 1693">Flow-focusing channel</p>  <p data-bbox="724 1738 791 1765">80µM</p> <p data-bbox="820 1738 887 1765">60µM</p> <p data-bbox="788 1895 855 1921">100µM</p> <p>The diagram shows a flow-focusing channel with three grey spheres at its ends. The top channel has a width of 80µm, the bottom channel has a width of 60µm, and the central channel has a width of 100µm.</p> |

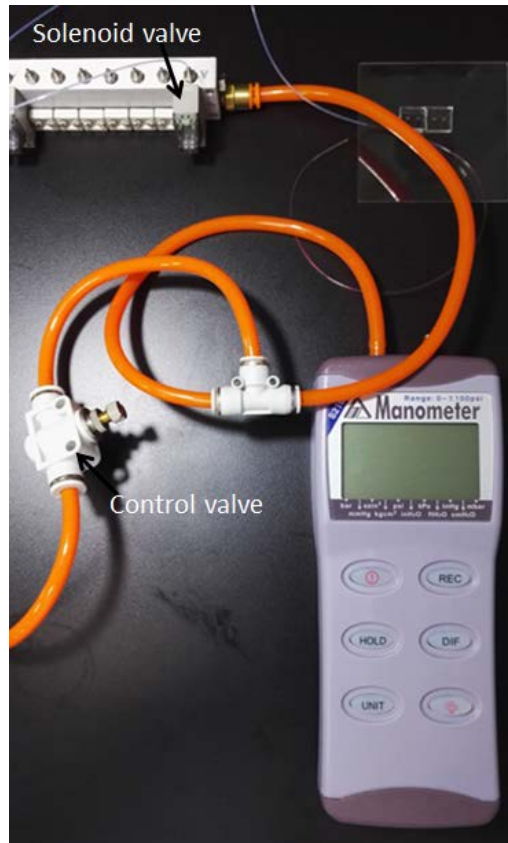

Figure S2 Set-up used for the leakage test of the modular microfluidic circuits. The solenoid valve is normally open and here just used as an adapter.

### **Fabrication of the glass reaction vessel**

The glass reaction vessels (length: ~15mm) with a tip end were made from borosilicate glass capillary tubes (outer diameter: 1.0mm, inner diameter: 0.5mm). Sharp tips were produced by the glass micropipette puller (Narishige PN-30, Japan), which allows for the rapid seal.

### **Pre-storage of reagents**

As shown in Figure S3, a measured volume of reagent solutions was dropped on a clean substrate such as the lid of the PCR tube by the pipettes. The plain end of the glass reaction vessel was inserted into the solution drop to draw the reagents by the capillary action. Then the sharp tip of the glass reaction vessel was heated for 2-3s by the alcohol burner to create a seal. Finally, the liquid was transferred from the plain end side to the tip end side of the vessel by centrifugation.

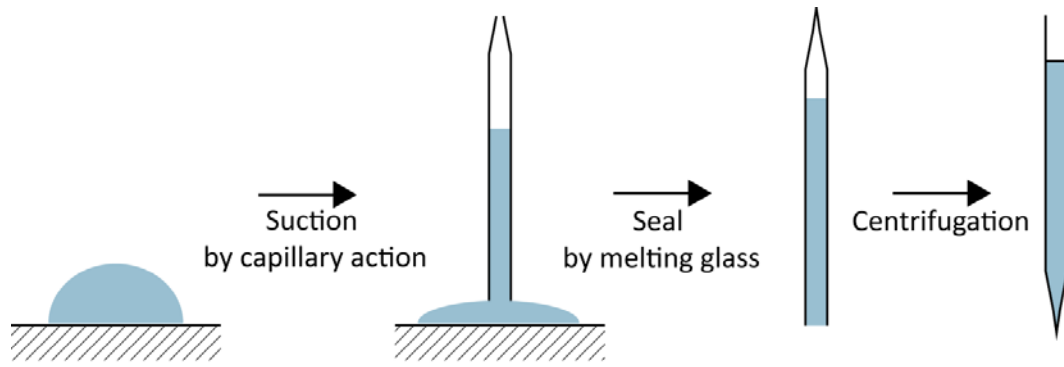

Figure S3 Process of preloading reagents
